# Supplementary material
Source: HighWire-hosted journal article supplement (https://rapm.bmj.com/highwire/filestream/17647/field_highwire_adjunct_files/0/rapm-2021-103189supp001_data_supplement.pdf)
Supplement: rapm-2021-103189supp001_data_supplement.pdf [file rapm-2021-103189supp001_data_supplement.pdf]

**Supplement Table 1. ICD-10 Codes used for obtaining postoperative complications**

| Complication               | ICD-10 Code                                                                                                                                                                                   |
|----------------------------|-----------------------------------------------------------------------------------------------------------------------------------------------------------------------------------------------|
| Surgical site infection    | T81.4, L03                                                                                                                                                                                    |
| Urinary tract infection    | N39                                                                                                                                                                                           |
| Myocardial infarction      | I21-I24                                                                                                                                                                                       |
| Pneumonia                  | A02.22, A31.0, A37, A40.3, A49.8, A54.84, B01.2, B25.0, B38.0, B39.2, B44.9, B45.0, B59, B77.81, B95.3, B96.0, B96.1, J09.X1, J10-J18, J69, J82, J84.112, J84.89, J84.9, J85, J95.851, J95.89 |
| VTE/PE                     | I82.4, I82.6, I26.x2, I26.x9, I80, I82                                                                                                                                                        |
| Cerebral Vascular Accident | G45, I63                                                                                                                                                                                      |
| Acute renal Failure        | N17                                                                                                                                                                                           |

Abbreviations: ICD-10 International Classification of Diseases, 10th Edition; VTE, Venous Thromboembolism; PE, Pulmonary Embolism
